# Supplementary material for: DNA Break Site at Fragile Subtelomeres Determines Probability and Mechanism of Antigenic Variation in African Trypanosomes
Source: PLOS journal article supplement (doi:10.1371/journal.ppat.1003260), 2013-03-28
Supplement: S2 (10.1371/journal.ppat.1003260.s002) [file journal.ppat.1003260.s002]

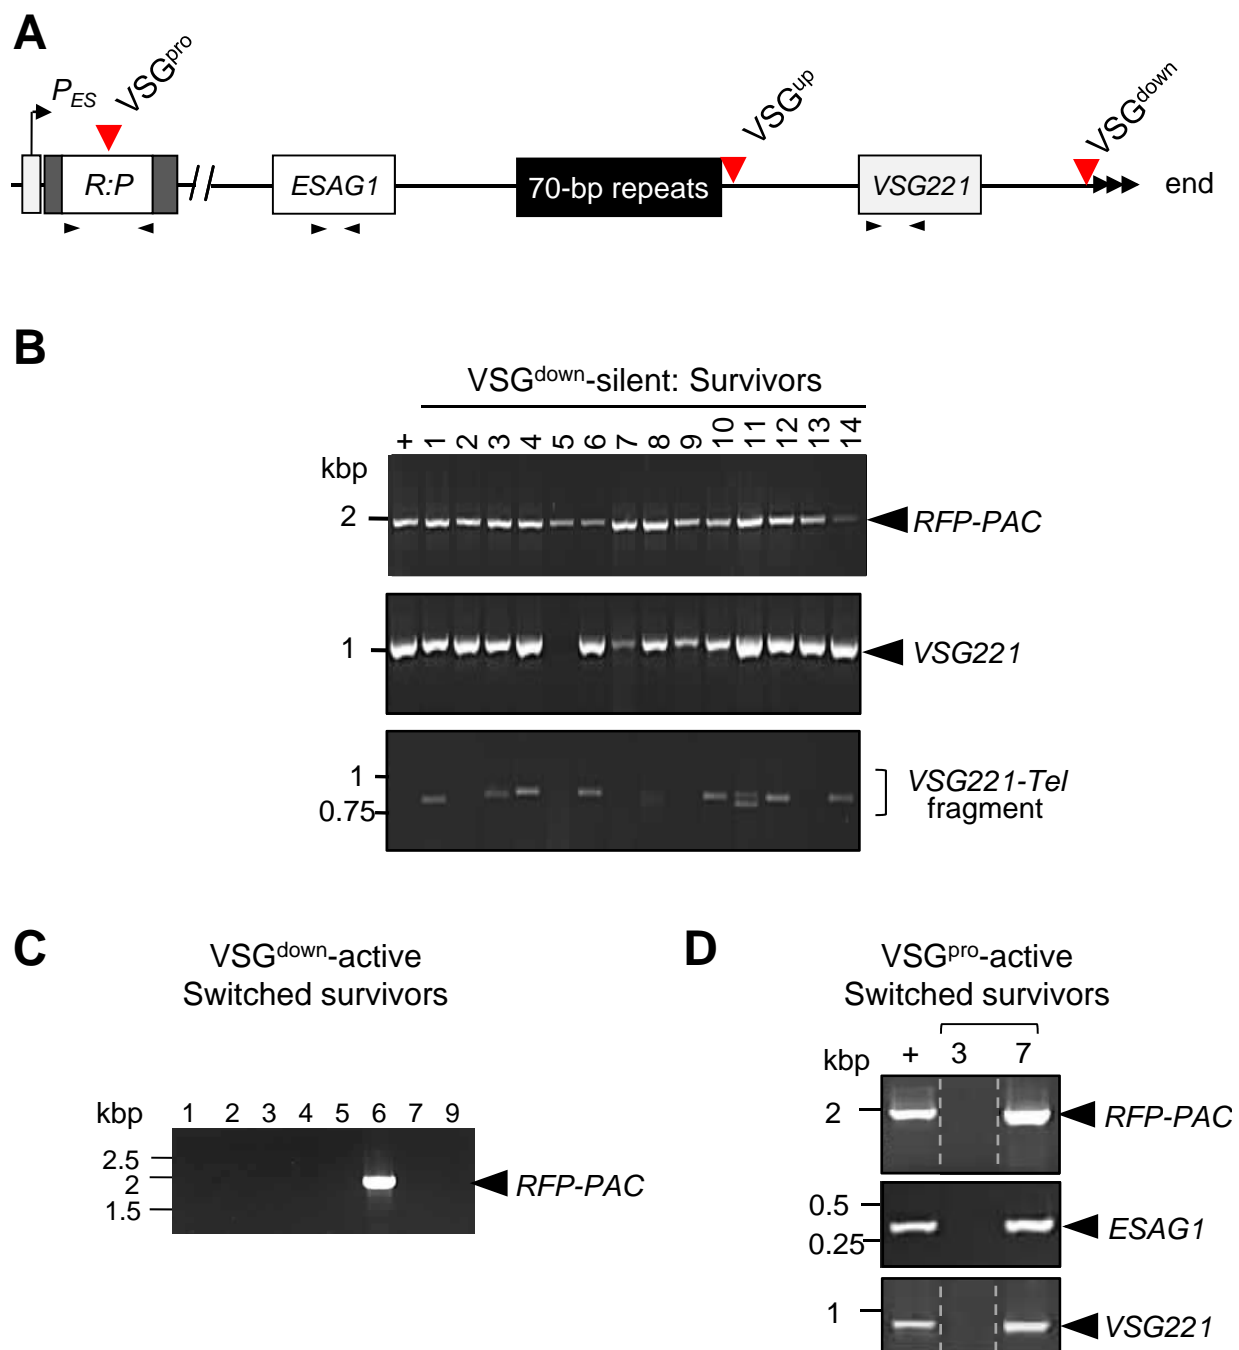

**Figure S2. BES PCR assays.** (A) The schematic map indicates the location of primers used for the BES PCR assays. Other details as in Figure 2A. (B) The PCR assays demonstrate *RFP-PAC* and *VSG221* gene status, and include an assay for *de novo* telomere healing close to the *VSG221* gene in survivors from VSG<sup>pro</sup>-silent BES cells, following I-SceI-mediated cleavage. +, positive control. (C) The PCR assay demonstrates *RFP-PAC* gene status following I-SceI-mediated cleavage in switched survivors from VSG<sup>down</sup>-active BES cells (see FIG. 4B). (D) The PCR assays demonstrate *RFP-PAC*, *ESAG1* and *VSG221* gene status following I-SceI-mediated cleavage in switched survivors from VSG<sup>pro</sup>-active BES cells. +, positive control.
